# Supplementary material
Source: MDPI journal article supplement (https://www.mdpi.com/2073-4344/11/7/763)
Supplement: s1 [file s1 › catalysts-1241595-supplementary.pdf]

## Supporting Information

### Synthesis of Hollow Mesoporous TiN Nanostructures as an Efficient Catalyst Support for Methanol Electro-oxidation

Yoon Hee Kim <sup>1</sup>, Hyeonkyeong Lee <sup>1</sup>, Dong Seop Choi <sup>1</sup>, Jiyull Kim <sup>1</sup>, Hyun Sung Jang <sup>1</sup>, Na Yeon Kim <sup>1</sup> and Ji Bong Joo <sup>1,\*</sup>

Department of Chemical Engineering, Konkuk University, Gwangjin-gu, Seoul, 05029, Republic of Korea

\* Correspondence: [jbjoo@konkuk.ac.kr](mailto:jbjoo@konkuk.ac.kr); Tel.: +82-2-450-3545

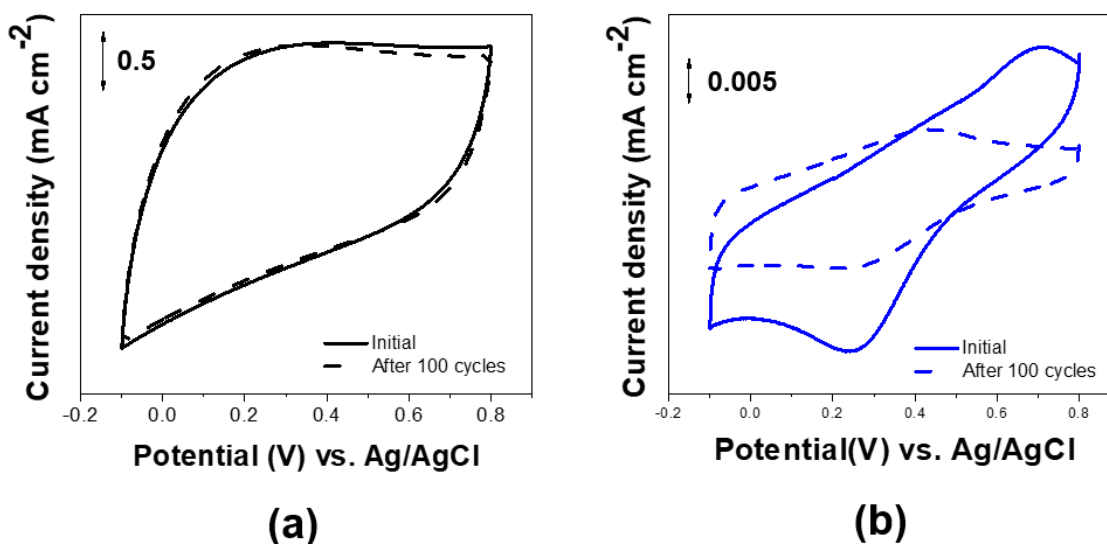

Figure S1. Continuous CV experiment results of H-TiN-800 and H-Anatase TiO<sub>2</sub> before and after 100th cycling between -0.1 V and 0.8 V in 0.5 M H<sub>2</sub>SO<sub>4</sub> conditions.

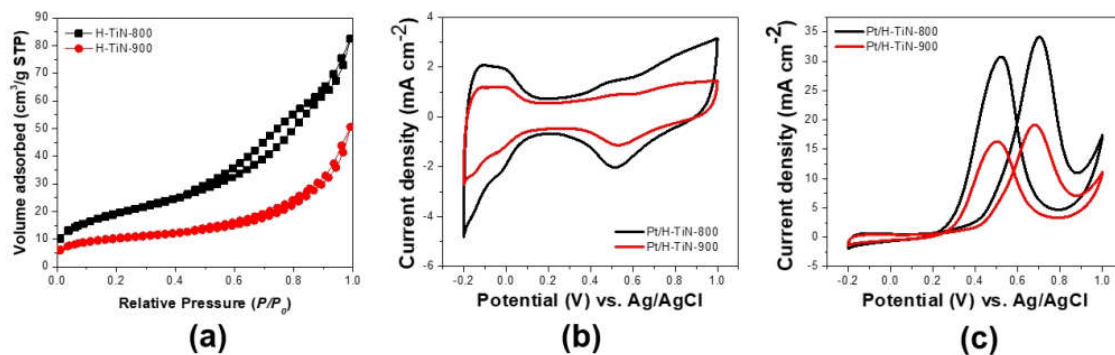

Figure S2. (a) Nitrogen adsorption/desorption isotherms of H-TiN-800 and H-TiN-900. CV results of Pt/H-TiN-800 and Pt/H-TiN-900 (b) in 0.5 M H<sub>2</sub>SO<sub>4</sub> and (c) in 0.5 M H<sub>2</sub>SO<sub>4</sub> containing 2 M CH<sub>3</sub>OH.

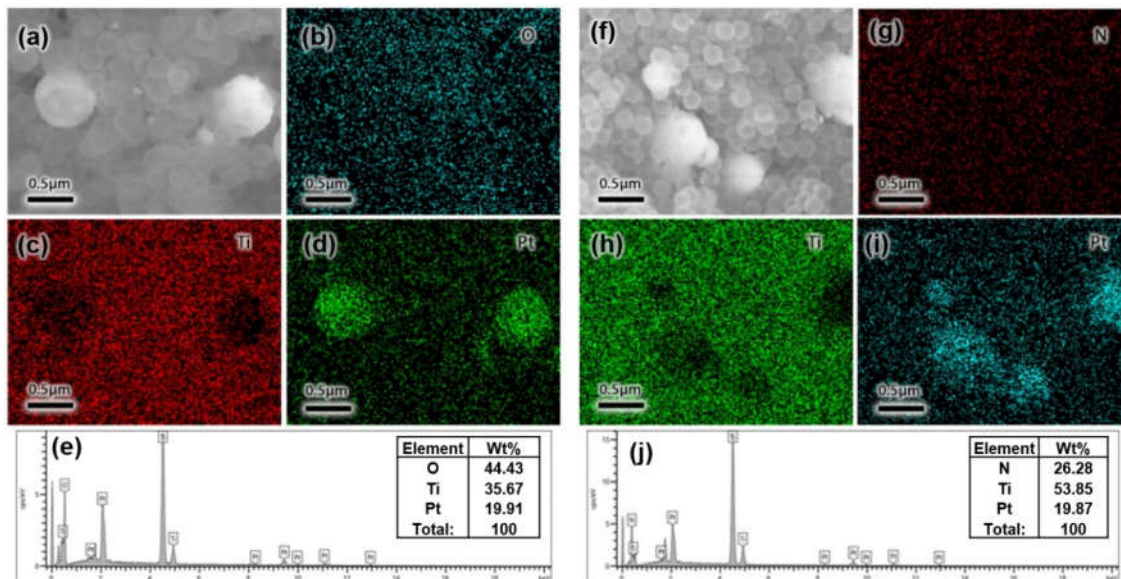

Figure S3. FE-SEM images, element mapping results and EDS spectra with element composition of (a-e) Pt/H-Anatase TiO<sub>2</sub>, and (f-j) Pt/H-TiN-800
